# Supplementary material for: Phase transition in the extreme: a cubic-to-triclinic symmetry change in dielectrically switchable cyanide perovskites
Source: Royal Society of Chemistry journal article supplement (doi:10.1039/c9dt03250a), 2019-01-01
Supplement: c9dt03250a1.pdf [file c9dt03250a1.pdf]

## Electronic Supplementary Information

### Phase transition in the extreme: a cubic-to-triclinic symmetry change in dielectrically switchable cyanide perovskites

Monika Trzebiatowska<sup>a\*</sup>, Anna Gągor<sup>a</sup>, Lucyna Macalik<sup>a</sup>, Paulina Peksa<sup>b</sup>, Adam Sieradzki<sup>b</sup>

<sup>a</sup>*Institute of Low Temperature and Structure Research, Polish Academy of Sciences, Box 1410, 50-950 Wrocław 2, Poland*

<sup>b</sup>*Faculty of Fundamental Problems of Technology, Wrocław University of Technology, Wybrzeże Wyspiańskiego 27, 50-370, Wrocław, Poland*

*\*corresponding author; e-mail: m.trzebiatowska@intibs.pl*

**Table S1.** The selected geometric parameters of FA<sub>2</sub>KM(CN)<sub>6</sub>, where M=Co, Fe (Å, °).

| <b>FA<sub>2</sub>KCo(CN)<sub>6</sub> 330 K</b> |             |                                         |             |
|------------------------------------------------|-------------|-----------------------------------------|-------------|
| Co1—C3 x 6                                     | 1.874 (4)   | K2—N1 x 6                               | 2.794 (4)   |
| C—Co—C <sub>trans</sub>                        | 180.0       | N—K—N                                   | 180.0       |
| C—Co—C <sub>cis</sub>                          | 90.000 (1)  | N—K—N                                   | 90.0        |
| <b>FA<sub>2</sub>KCo(CN)<sub>6</sub> 290 K</b> |             |                                         |             |
| Co1—C6                                         | 1.898 (2)   | K2—N5 <sup>v</sup>                      | 2.832 (2)   |
| Co1—C6 <sup>i</sup>                            | 1.898 (2)   | K2—N3 <sup>vii</sup>                    | 2.847 (2)   |
| Co1—C8 <sup>i</sup>                            | 1.899 (2)   | K2—N3 <sup>vi</sup>                     | 2.847 (2)   |
| Co1—C8                                         | 1.899 (2)   | N7—C8                                   | 1.145 (3)   |
| Co1—C4                                         | 1.896 (2)   | N9—C11                                  | 1.277 (4)   |
| Co1—C4 <sup>i</sup>                            | 1.896 (2)   | N3—C6                                   | 1.148 (3)   |
| K2—N7 <sup>ii</sup>                            | 2.831 (2)   | C4—N5                                   | 1.143 (3)   |
| K2—N7 <sup>iii</sup>                           | 2.831 (2)   | N10—C11                                 | 1.274 (4)   |
| K2—N5 <sup>iv</sup>                            | 2.832 (2)   |                                         |             |
| C6—Co1—C6 <sup>i</sup>                         | 180.00 (10) | N7 <sup>iii</sup> —K2—N5 <sup>v</sup>   | 79.16 (8)   |
| C6—Co1—C8 <sup>i</sup>                         | 89.85 (10)  | N5 <sup>iv</sup> —K2—N5 <sup>v</sup>    | 180.0       |
| C6 <sup>i</sup> —Co1—C8 <sup>i</sup>           | 90.15 (10)  | N7 <sup>ii</sup> —K2—N3 <sup>vi</sup>   | 90.55 (7)   |
| C6—Co1—C8                                      | 90.15 (10)  | N7 <sup>iii</sup> —K2—N3 <sup>vi</sup>  | 89.45 (7)   |
| C6 <sup>i</sup> —Co1—C8                        | 89.85 (10)  | N5 <sup>iv</sup> —K2—N3 <sup>vi</sup>   | 87.62 (8)   |
| C8 <sup>i</sup> —Co1—C8                        | 180.0       | N5 <sup>v</sup> —K2—N3 <sup>vi</sup>    | 92.38 (8)   |
| C6—Co1—C4                                      | 91.14 (11)  | N7 <sup>ii</sup> —K2—N3 <sup>vii</sup>  | 89.45 (7)   |
| C6 <sup>i</sup> —Co1—C4                        | 88.86 (11)  | N7 <sup>iii</sup> —K2—N3 <sup>vii</sup> | 90.55 (7)   |
| C8 <sup>i</sup> —Co1—C4                        | 90.72 (10)  | N5 <sup>iv</sup> —K2—N3 <sup>vii</sup>  | 92.38 (8)   |
| C8—Co1—C4                                      | 89.28 (10)  | N5 <sup>v</sup> —K2—N3 <sup>vii</sup>   | 87.62 (8)   |
| C6—Co1—C4 <sup>i</sup>                         | 88.86 (11)  | N3 <sup>vi</sup> —K2—N3 <sup>vii</sup>  | 180.00 (17) |
| C6 <sup>i</sup> —Co1—C4 <sup>i</sup>           | 91.14 (11)  | C6—N3—K2 <sup>viii</sup>                | 163.3 (2)   |
| C8 <sup>i</sup> —Co1—C4 <sup>i</sup>           | 89.28 (10)  | N5—C4—Co1                               | 176.8 (2)   |
| C8—Co1—C4 <sup>i</sup>                         | 90.72 (10)  | C4—N5—K2 <sup>ix</sup>                  | 146.0 (2)   |

---

|                                        |             |                       |           |
|----------------------------------------|-------------|-----------------------|-----------|
| C4—Co1—C4 <sup>i</sup>                 | 180.0       | N3—C6—Co1             | 178.7 (2) |
| N7 <sup>ii</sup> —K2—N7 <sup>iii</sup> | 180.00 (17) | C8—N7—K2 <sup>x</sup> | 160.7 (2) |
| N7 <sup>ii</sup> —K2—N5 <sup>iv</sup>  | 79.16 (8)   | N7—C8—Co1             | 177.9 (2) |
| N7 <sup>iii</sup> —K2—N5 <sup>iv</sup> | 100.84 (8)  | N10—C11—N9            | 124.6 (3) |
| N7 <sup>ii</sup> —K2—N5 <sup>v</sup>   | 100.84 (8)  |                       |           |

**FA<sub>2</sub>KFe(CN)<sub>6</sub> 330 K**

|                     |               |                     |              |
|---------------------|---------------|---------------------|--------------|
| Fe1—C3              | 1.917 (5) x 6 | K2—N1 <sup>xv</sup> | 2.783 (5) x6 |
| C—Fe—C              | 90.0          | N—K—N               | 90.0         |
| C—Fe—C <sup>i</sup> | 180.0         | N—K—N               | 180.0        |

**FA<sub>2</sub>KFe(CN)<sub>6</sub> 290 K**

|                     |             |                      |             |
|---------------------|-------------|----------------------|-------------|
| Fe1—C4              | 1.938 (2)   | K2—N7 <sup>iii</sup> | 2.8298 (18) |
| Fe1—C4 <sup>i</sup> | 1.938 (2)   | K2—N3 <sup>vii</sup> | 2.8441 (17) |
| Fe1—C8              | 1.938 (2)   | K2—N3 <sup>vi</sup>  | 2.8441 (17) |
| Fe1—C8 <sup>i</sup> | 1.938 (2)   | N3—C6                | 1.143 (2)   |
| Fe1—C6              | 1.9425 (19) | C4—N5                | 1.144 (3)   |
| Fe1—C6 <sup>i</sup> | 1.9425 (19) | N7—C8                | 1.147 (2)   |
| K2—N5 <sup>iv</sup> | 2.824 (2)   | N9—C11               | 1.269 (3)   |
| K2—N5 <sup>v</sup>  | 2.824 (2)   | N10—C11              | 1.279 (3)   |
| K2—N7 <sup>ii</sup> | 2.8298 (18) |                      |             |

|                                        |             |                                         |             |
|----------------------------------------|-------------|-----------------------------------------|-------------|
| C4—Fe1—C4 <sup>i</sup>                 | 180.0       | N5 <sup>v</sup> —K2—N7 <sup>iii</sup>   | 79.96 (6)   |
| C4—Fe1—C8                              | 88.75 (8)   | N7 <sup>ii</sup> —K2—N7 <sup>iii</sup>  | 180.00 (7)  |
| C4 <sup>i</sup> —Fe1—C8                | 91.25 (8)   | N5 <sup>iv</sup> —K2—N3 <sup>vii</sup>  | 92.61 (6)   |
| C4—Fe1—C8 <sup>i</sup>                 | 91.25 (8)   | N5 <sup>v</sup> —K2—N3 <sup>vii</sup>   | 87.39 (6)   |
| C4 <sup>i</sup> —Fe1—C8 <sup>i</sup>   | 88.75 (8)   | N7 <sup>ii</sup> —K2—N3 <sup>vii</sup>  | 89.71 (5)   |
| C8—Fe1—C8 <sup>i</sup>                 | 180.0       | N7 <sup>iii</sup> —K2—N3 <sup>vii</sup> | 90.29 (5)   |
| C4—Fe1—C6                              | 92.05 (8)   | N5 <sup>iv</sup> —K2—N3 <sup>vi</sup>   | 87.39 (6)   |
| C4 <sup>i</sup> —Fe1—C6                | 87.95 (8)   | N5 <sup>v</sup> —K2—N3 <sup>vi</sup>    | 92.61 (6)   |
| C8—Fe1—C6                              | 89.82 (8)   | N7 <sup>ii</sup> —K2—N3 <sup>vi</sup>   | 90.29 (5)   |
| C8 <sup>i</sup> —Fe1—C6                | 90.18 (8)   | N7 <sup>iii</sup> —K2—N3 <sup>vi</sup>  | 89.71 (5)   |
| C4—Fe1—C6 <sup>i</sup>                 | 87.95 (8)   | N3 <sup>vii</sup> —K2—N3 <sup>vi</sup>  | 180.0       |
| C4 <sup>i</sup> —Fe1—C6 <sup>i</sup>   | 92.05 (8)   | C6—N3—K2 <sup>viii</sup>                | 161.73 (19) |
| C8—Fe1—C6 <sup>i</sup>                 | 90.18 (8)   | N5—C4—Fe1                               | 177.03 (19) |
| C8 <sup>i</sup> —Fe1—C6 <sup>i</sup>   | 89.82 (8)   | C4—N5—K2 <sup>ix</sup>                  | 145.63 (18) |
| C6—Fe1—C6 <sup>i</sup>                 | 180.0       | N3—C6—Fe1                               | 178.83 (19) |
| N5 <sup>iv</sup> —K2—N5 <sup>v</sup>   | 180.00 (13) | C8—N7—K2 <sup>x</sup>                   | 160.71 (18) |
| N5 <sup>iv</sup> —K2—N7 <sup>ii</sup>  | 79.96 (6)   | N7—C8—Fe1                               | 177.97 (19) |
| N5 <sup>v</sup> —K2—N7 <sup>ii</sup>   | 100.04 (6)  | N9—C11—N10                              | 125.0 (3)   |
| N5 <sup>iv</sup> —K2—N7 <sup>iii</sup> | 100.04 (6)  |                                         |             |

---

Symmetry codes: (i) -x+1, -y+1, -z+1; (ii) -x, -y+1, -z; (iii) x, y-1, z; (iv) -x+1, -y+1, -z; (v) x-1, y-1, z; (vi) x, y-1, z-1; (vii) -x, -y+1, -z+1; (viii) x, y+1, z+1; (ix) x+1, y+1, z; (x) x, y+1, z; (xi) -y+1/2, -z+1, -x+1/2; (xii) y-1/2, z, x+1/2; (xiii) z-1/2, x+1/2, y; (xiv) -z+1/2, -x+1/2, -y+1; (xv) -y+1, -z+1, -x+1; (xvi) z, x, y; (xvii) -z+1, -x+1, -y+1; (xviii) y, z, x.

**Table S2.** The atomic displacements from HT to LT positions calculated in Amplimodes for FA<sub>2</sub>KCo(CN)<sub>6</sub>.

| FA <sub>2</sub> KCo(CN) <sub>6</sub> |               |           | Atomic Displacements |                |               |               |
|--------------------------------------|---------------|-----------|----------------------|----------------|---------------|---------------|
| WP                                   |               | Atom      | ux                   | uy             | uz            | u             |
| 1h                                   | (1/2,1/2,1/2) | Co1       | 0.0000               | 0.0000         | 0.0000        | 0.0000        |
| 1a                                   | (0,0,0)       | K2        | 0.0000               | 0.0000         | 0.0000        | 0.0000        |
| 2i                                   | (x,y,z)       | C6        | 0.0263               | 0.0260         | -0.0247       | 0.3037        |
| 2i                                   | (x,y,z)       | C8        | -0.0264              | -0.0208        | 0.0228        | 0.2749        |
| 2i                                   | (x,y,z)       | C4        | 0.0627               | -0.0549        | 0.0128        | 0.5037        |
| 2i                                   | (x,y,z)       | N3        | 0.0390               | 0.0404         | -0.0379       | 0.4610        |
| 2i                                   | (x,y,z)       | N7        | -0.0484              | -0.0336        | 0.0402        | 0.4797        |
| 2i                                   | (x,y,z)       | <b>N5</b> | <b>0.1046</b>        | <b>-0.0950</b> | <b>0.0167</b> | <b>0.8396</b> |

ux, uy and uz are given in relative units. |u| is the absolute distance given in Å; Maximum atomic displacement in the distortion, Δ: 0.8396 Å; Total distortion amplitude: 1.7715 Å

**Table S3.** The atomic displacements from HT to LT positions calculated in Amplimodes for FA<sub>2</sub>KFe(CN)<sub>6</sub>.

| FA <sub>2</sub> KFe(CN) <sub>6</sub> |               |           | Atomic Displacements |                |               |               |
|--------------------------------------|---------------|-----------|----------------------|----------------|---------------|---------------|
| WP                                   |               | Atom      | ux                   | uy             | uz            | u             |
| 1h                                   | (1/2,1/2,1/2) | Fe1       | 0.0000               | 0.0000         | 0.0000        | 0.0000        |
| 1a                                   | (0,0,0)       | K2        | 0.0000               | 0.0000         | 0.0000        | 0.0000        |
| 2i                                   | (x,y,z)       | C6        | 0.0270               | 0.0289         | -0.0267       | 0.3264        |
| 2i                                   | (x,y,z)       | C8        | -0.0268              | -0.0210        | 0.0224        | 0.2802        |
| 2i                                   | (x,y,z)       | C4        | 0.0633               | -0.0566        | 0.0085        | 0.5058        |
| 2i                                   | (x,y,z)       | N3        | 0.0405               | 0.0449         | -0.0424       | 0.4986        |
| 2i                                   | (x,y,z)       | N7        | -0.0483              | -0.0337        | 0.0394        | 0.4824        |
| 2i                                   | (x,y,z)       | <b>N5</b> | <b>0.1050</b>        | <b>-0.0975</b> | <b>0.0112</b> | <b>0.8457</b> |

ux, uy and uz are given in relative units. |u| is the absolute distance given in Å. Maximum atomic displacement in the distortion, Δ: 0.8457 Å; Total distortion amplitude: 1.8096 Å

**Table S4.** The factor group analysis for FA<sub>2</sub>KM(CN)<sub>6</sub> (M=Co, Fe) in the LT and HT phase. The data in the parentheses correspond to the HT phase. Note, that the formamidinium cation in the HT phase is highly disordered and therefore its analysis is not given here. The **IR-active** modes are marked in red, the **Raman-active** - in blue, the modes active in **both IR and Raman** spectra are in **black** and the **silent** ones - in green.

| Ion             | Vibration                       | Free ion symmetry                | Site symmetry                         | Factor group symmetry                                                  |
|-----------------|---------------------------------|----------------------------------|---------------------------------------|------------------------------------------------------------------------|
|                 |                                 | <b>C<sub>∞v</sub></b>            | <b>C<sub>1</sub> (C<sub>4v</sub>)</b> | <b>C<sub>i</sub> (O<sub>h</sub>)</b>                                   |
| CN <sup>-</sup> | v                               | A <sub>1</sub>                   | A (A <sub>1</sub> )                   | A <sub>g</sub> +A <sub>u</sub> (2A <sub>1g</sub> +2E <sub>g</sub> )    |
|                 | T'                              | A <sub>1</sub> +E <sub>1</sub>   | 3A (A <sub>1</sub> +E)                | 3A <sub>g</sub> +3A <sub>u</sub> (2F <sub>2g</sub> +4F <sub>1u</sub> ) |
|                 | L                               | A <sub>2</sub> +E <sub>1</sub> * | 2A (A <sub>2</sub> +E)*               | 2A <sub>g</sub> +2A <sub>u</sub> (2F <sub>1g</sub> +2F <sub>2u</sub> ) |
|                 |                                 | <b>C<sub>2v</sub></b>            | <b>C<sub>1</sub></b>                  | <b>C<sub>i</sub></b>                                                   |
| FA <sup>+</sup> | v <sub>s</sub> NH <sub>2</sub>  | A <sub>1</sub> +B <sub>1</sub>   | 2A                                    | 2A <sub>g</sub> +2A <sub>u</sub>                                       |
|                 | v <sub>as</sub> NH <sub>2</sub> | A <sub>1</sub> +B <sub>1</sub>   | 2A                                    | 2A <sub>g</sub> +2A <sub>u</sub>                                       |
|                 | δNH <sub>2</sub>                | A <sub>1</sub> +B <sub>1</sub>   | 2A                                    | 2A <sub>g</sub> +2A <sub>u</sub>                                       |
|                 | ρNH <sub>2</sub>                | A <sub>1</sub> +B <sub>1</sub>   | 2A                                    | 2A <sub>g</sub> +2A <sub>u</sub>                                       |
|                 | ωNH <sub>2</sub>                | A <sub>2</sub> +B <sub>2</sub>   | 2A                                    | 2A <sub>g</sub> +2A <sub>u</sub>                                       |
|                 | τNH <sub>2</sub>                | A <sub>2</sub> +B <sub>2</sub>   | 2A                                    | 2A <sub>g</sub> +2A <sub>u</sub>                                       |
|                 | v <sub>s</sub> NCN              | A <sub>1</sub>                   | A                                     | A <sub>g</sub> +A <sub>u</sub>                                         |

|                       |               |                                      |                                      |
|-----------------------|---------------|--------------------------------------|--------------------------------------|
| $\nu_{as}NCN$         | $B_1$         | A                                    | $A_g+A_u$                            |
| $\delta NCN$          | $A_1$         | A                                    | $A_g+A_u$                            |
| $\nu CH$              | $A_1$         | A                                    | $A_g+A_u$                            |
| $\delta CH$           | $B_1$         | A                                    | $A_g+A_u$                            |
| $\gamma CH$           | $B_2$         | A                                    | $A_g+A_u$                            |
| T'                    | $A_1+B_1+B_2$ | 3A                                   | $3A_g+3A_u$                          |
| L                     | $A_2+B_1+B_2$ | 3A                                   | $3A_g+3A_u$                          |
| <b>M<sup>3+</sup></b> |               | <b>C<sub>i</sub> (O<sub>h</sub>)</b> | <b>C<sub>i</sub> (O<sub>h</sub>)</b> |
|                       |               | $3A_u (F_{1u})$                      | $3A_u (F_{1u})$                      |
| <b>K<sup>+</sup></b>  |               | <b>C<sub>i</sub> (O<sub>h</sub>)</b> | <b>C<sub>i</sub> (O<sub>h</sub>)</b> |
|                       |               | $3A_u (F_{1u})$                      | $3A_u (F_{1u})$                      |

\*one L is subtracted

**Table S5.** The observed Raman and IR modes (in  $cm^{-1}$ ) of  $FA_2KM(CN)_6$  (M=Co, Fe) and their proposed assignment.

| $FA_2KCo(CN)_6$ |        |        |        | $FA_2KFe(CN)_6$ |        | Assignment                     |
|-----------------|--------|--------|--------|-----------------|--------|--------------------------------|
| IR              |        | Raman  |        | IR              |        |                                |
| 80 K            | 350 K  | 80 K   | 350 K  | 80 K            | 350 K  |                                |
| 3441s           | 3442s  | 3437w  | 3440w  | 3442s           | 3444s  | $\nu_{as}NH_2$ $2x\delta NH_2$ |
| 3423s           | 3379s  |        |        | 3423s           |        | $\nu_{as}NH_2$                 |
| 3372s           |        |        |        | 3372m           | 3382m  | combination                    |
| 3344s           |        |        | 3345m  | 3342m           |        | $\nu_{as}NH_2$                 |
| 3306s           |        | 3307m  |        | 3306m           |        | $\nu_{as}NH_2$ $\nu_sNH_2$     |
| 3291s           | 3284s  | 3291w  |        | 3291m           | 3287s  | combination                    |
| 3264s           |        | 3264m  | 3250m  | 3261s           |        | $\nu_sNH_2$                    |
| 3236s           |        | 3229m  |        | 3236s           |        | $\nu_sNH_2$                    |
| 3188s           | 3192s  |        |        | 3188m           | 3193m  | combination                    |
| 3156s           |        |        |        | 3157m           |        | combination                    |
|                 |        | 3097m  | 3096w  | 3121sh          |        | combination                    |
| 3025sh          |        | 3038w  | 3031w  | 3025w           | 3034w  | $\nu CH$                       |
| 2834w           | 2828vw |        |        | 2835w           | 2823vw | combination                    |
| 2785w           |        |        |        | 2786vw          |        | combination                    |
| 2755w           |        |        |        | 2757w           | 2747w  | combination                    |
| 2739w           | 2744w  |        |        | 2739w           |        | combination                    |
| 2705vw          |        |        |        | 2656vw          |        | combination                    |
| 2658w           | 2657vw |        |        | 2628vw          |        | $2x\rho NH_2$                  |
| 2624w           |        |        |        | 2586vw          |        | $2x\rho NH_2$                  |
| 2588w           |        |        |        | 2511vw          |        | $2x\rho NH_2$                  |
| 2551w           |        |        |        | 2459vw          |        | combination                    |
| 2544w           | 2538vw |        |        |                 |        | combination                    |
|                 |        | 2153vs | 2148vs | 2118s           | 2114s  | $\nu CN$                       |
| 2129vs          | 2125vs | 2138vs | 2135s  |                 |        | $\nu CN$                       |
| 1716vs          | 1722vs |        |        | 1716vs          | 1723vs | $\delta NH_2$                  |
| 1625m           | 1636w  | 1622vw |        | 1623w           | 1640vw | $\delta NH_2$                  |

|        |        |        |        |       |        |                                                            |
|--------|--------|--------|--------|-------|--------|------------------------------------------------------------|
| 1582vw |        |        | 1568vw |       |        | $\delta\text{NH}_2$                                        |
| 1557w  | 1556vw | 1552vw |        |       |        | $\nu_{\text{as}}\text{NCN}$                                |
| 1400m  | 1397m  | 1403w  | 1396m  | 1401m | 1402m  | $\delta\text{CH}$                                          |
| 1342m  | 1341m  | 1346vw |        | 1342m | 1343m  | $\rho\text{NH}_2$                                          |
| 1270m  | 1260m  |        |        | 1268m | 1245w  | $\rho\text{NH}_2$                                          |
| 1219w  |        |        |        | 1219w |        | $\rho\text{NH}_2$                                          |
| 1125w  | 1116vw | 1123w  | 1115w  | 1125w | 1111vw | $\nu_s\text{NCN}$                                          |
| 1055m  | 1065w  | 1055w  |        | 1055m | 1065w  | $\omega\text{NH}_2$                                        |
| 1041m  | 1029vw |        |        | 1042w |        | $\omega\text{NH}_2$                                        |
| 896w   | 893vw  |        |        | 876vw | 874vw  | combination                                                |
|        |        |        |        | 828vw | 825vw  | combination                                                |
| 771w   |        |        |        | 772w  |        | $\gamma\text{CH}$                                          |
|        |        |        |        | 747vw | 741vw  | combination                                                |
| 668m   | 667m   | 654vw  | 666vw  | 675m  | 639m   | $\delta\text{NCN } \tau\text{NH}_2$                        |
| 628s   | 641s   |        |        | 627m  |        | $\tau\text{NH}_2$                                          |
| 586m   |        |        |        |       |        | $\tau\text{NH}_2$                                          |
| 565m   |        |        |        |       |        | $\text{T}'\text{CN}^-$                                     |
|        |        | 532vw  | 528vw  |       |        | $\text{T}'\text{CN}^-$                                     |
|        |        | 415m   | 411m   |       |        | $\text{T}'\text{CN}^-$                                     |
|        |        | 342vw  |        |       |        | $\text{T}'\text{CN}^-$                                     |
|        |        | 331vw  |        |       |        | $\text{T}'\text{FA}^+$                                     |
|        |        | 209w   |        |       |        | $\text{LCN}^- \text{T}'\text{M}^{3+}$                      |
|        |        | 179m   |        |       |        | $\text{LCN}^- \text{T}'\text{M}^{3+} \text{T}'\text{FA}^+$ |
|        |        | 140w   | 147m   |       |        | $\text{T}'\text{M}^{3+}$                                   |
|        |        | 114w   |        |       |        | $\text{LM}^{3+} \text{LFA}^+$                              |
|        |        | 106w   |        |       |        | $\text{LM}^{3+} \text{LFA}^+$                              |

Key: s-very strong, s-strong, m-medium, w-weak, vw-very weak, sh-shoulder;  $\nu_s$ -symmetric stretching,  $\nu_{\text{as}}$ -asymmetric stretching,  $\delta$ -in-plane bending (scissoring),  $\rho$ -rocking,  $\omega$ -wagging,  $\tau$ -twisting (torsion),  $\gamma$ -out-of-plane bending, T-translation, L-libration.

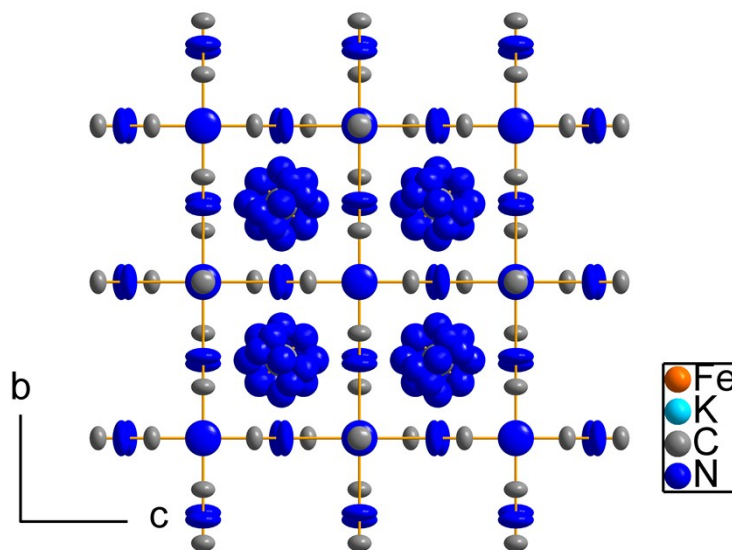

**Figure S1.** The crystal structure of  $\text{FA}_2\text{KFe}(\text{CN})_6$  at 330 K in the cubic phase. The anisotropic displacement parameters are drawn at 50% probability level.

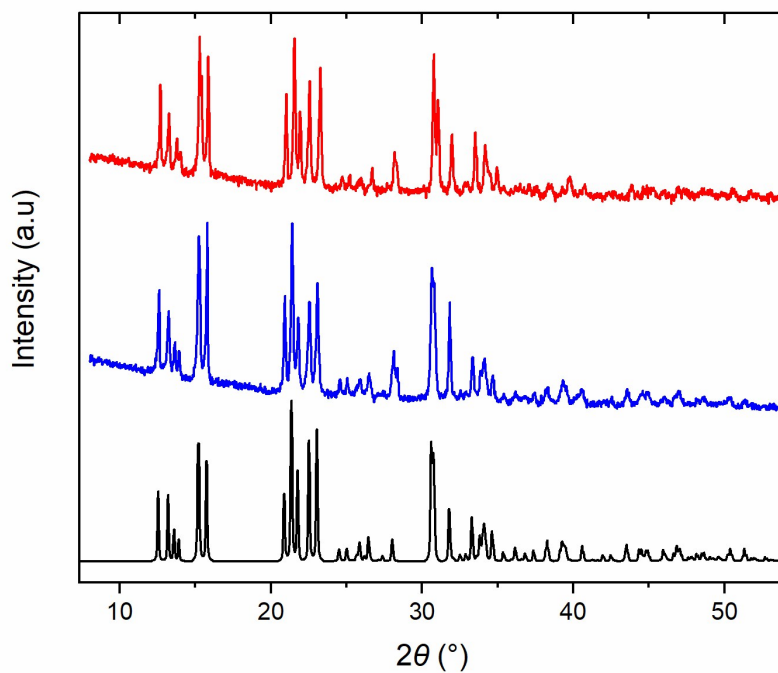

**Figure S2.** The powder X-ray diffraction patterns: of  $\text{FA}_2\text{KCo}(\text{CN})_6$  (red),  $\text{FA}_2\text{KFe}(\text{CN})_6$  (blue) referred against a **calculated** pattern based on the crystal structure of Co-sample (black).

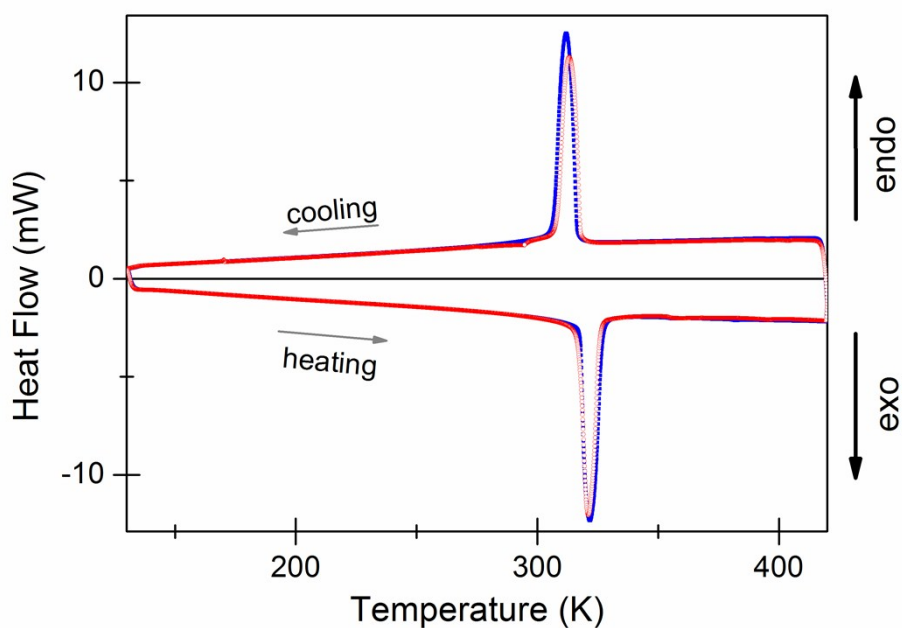

**Figure S3.** DSC traces for the  $\text{FA}_2\text{KCo}(\text{CN})_6$  (red) and  $\text{FA}_2\text{KFe}(\text{CN})_6$  (blue) samples in heating and cooling modes at constant sweeping rate 5 K/min.

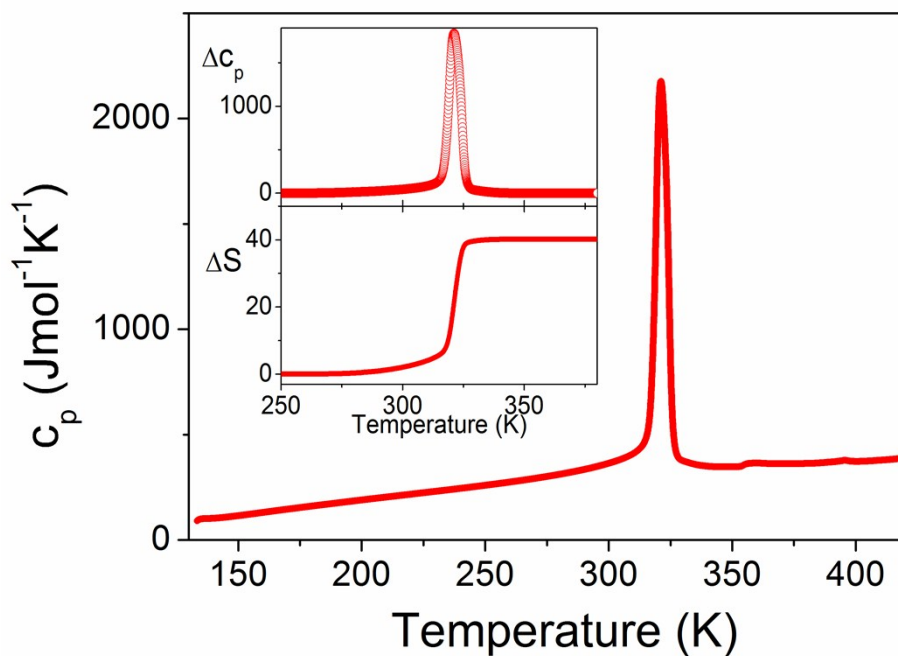

**Figure S4.** The heat capacity of  $\text{FA}_2\text{KFe}(\text{CN})_6$  measured in a heating mode. The insets show the change in  $C_p$  and  $S$  related to the phase transition.

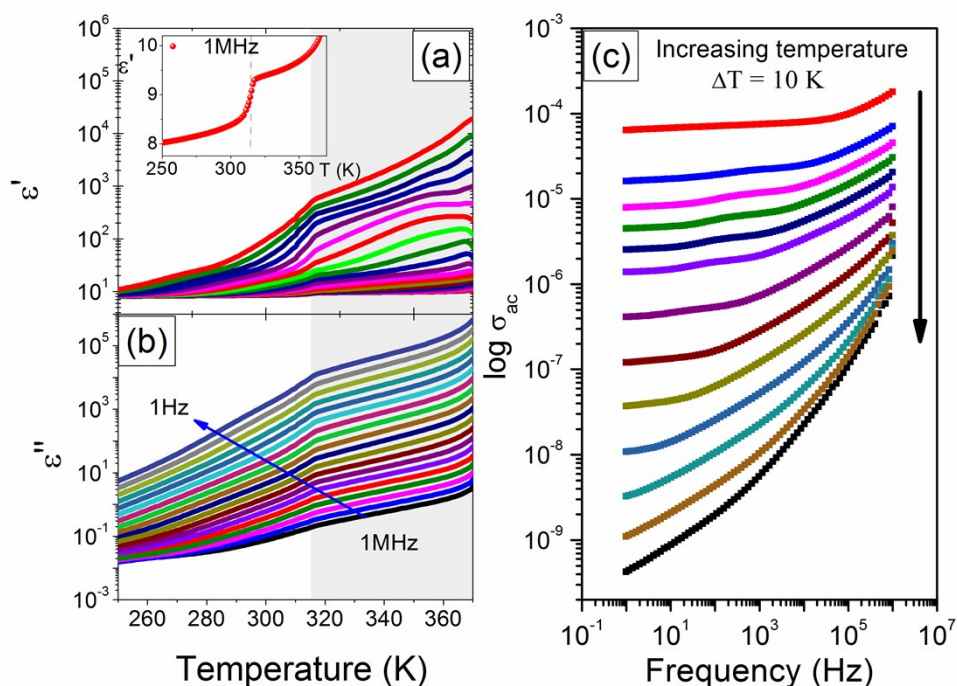

**Figure S5.** The temperature dependence of real part of dielectric permittivity (a) and dielectric loss (b) and the compilation of the data for the AC conductivity below (c) and above (d) the phase transition temperature of a polycrystalline pellet  $\text{FA}_2\text{KFe}(\text{CN})_6$ .

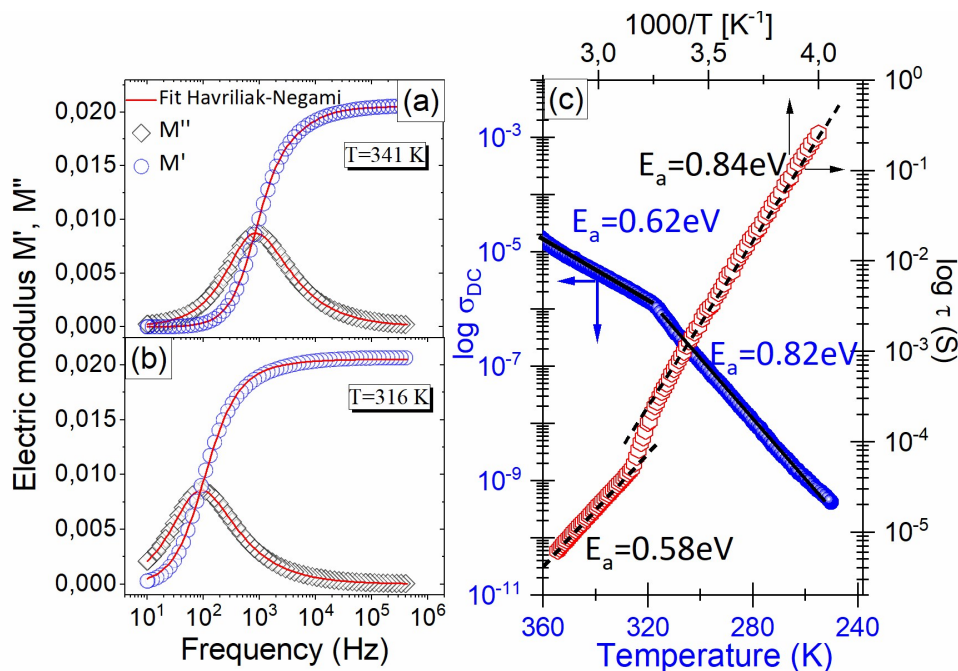

**Figure S6.** The experimental data fitted according to H-N (a) (b) and a relaxation map as a function of  $1000/T$  (red) and the compilation of the data for the DC conductivity (blue) (c) of polycrystalline pellet  $\text{FA}_2\text{KFe}(\text{CN})_6$ .



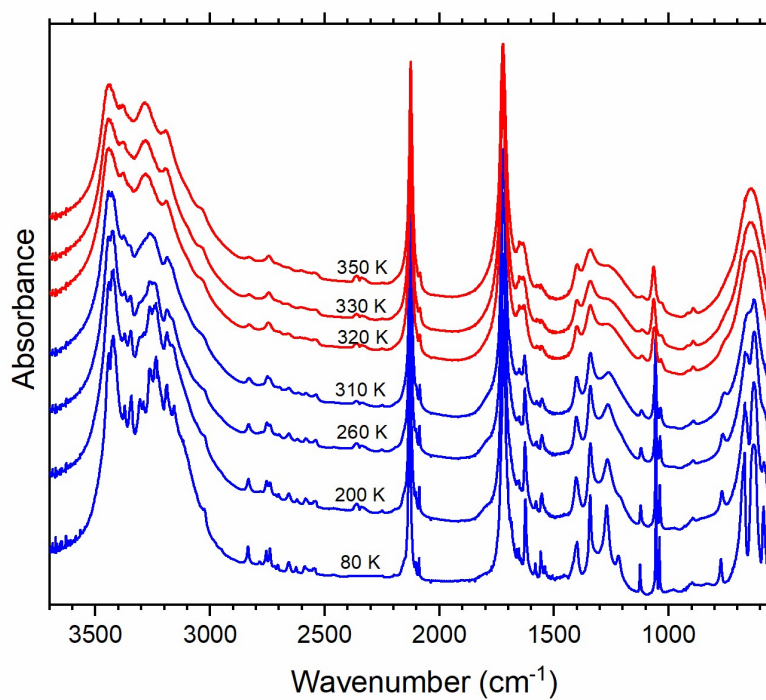

**Figure S7.** The temperature-dependent IR spectra in the full wavenumber range of  $\text{FA}_2\text{KCo}(\text{CN})_6$ .

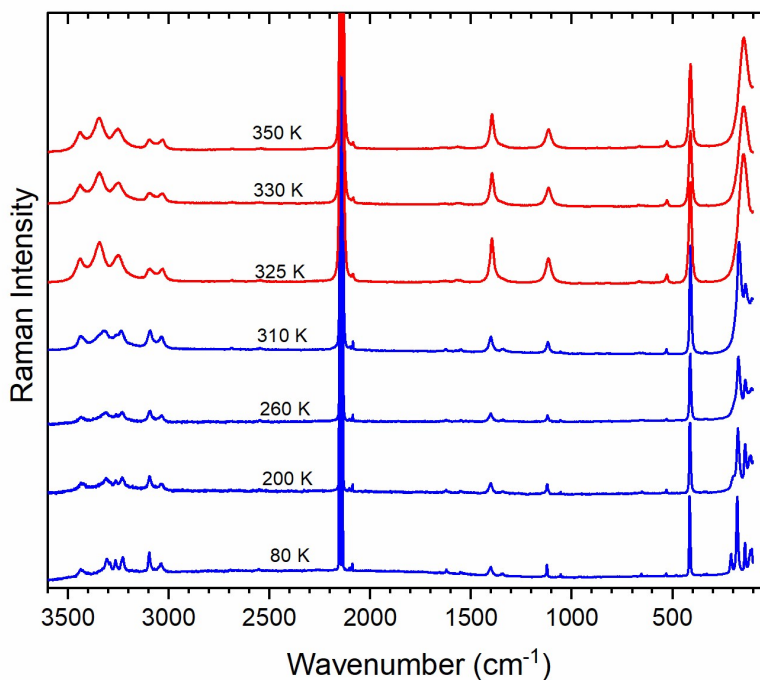

**Figure S8.** The temperature-dependent Raman spectra in the full wavenumber range of  $\text{FA}_2\text{KCo}(\text{CN})_6$ .

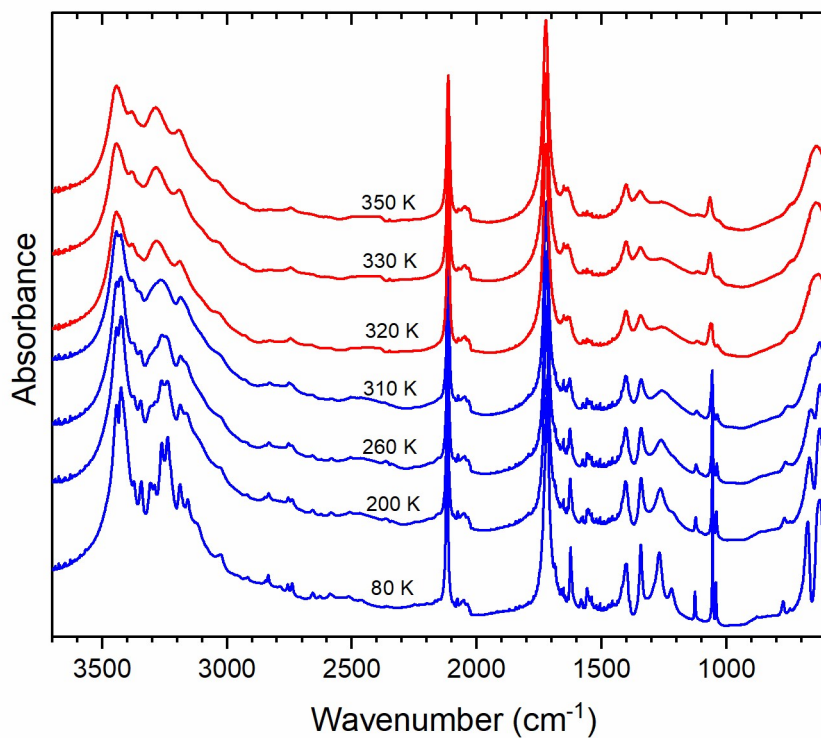

**Figure S9.** The temperature-dependent IR spectra in the full wavenumber range of  $\text{FA}_2\text{KFe}(\text{CN})_6$ .

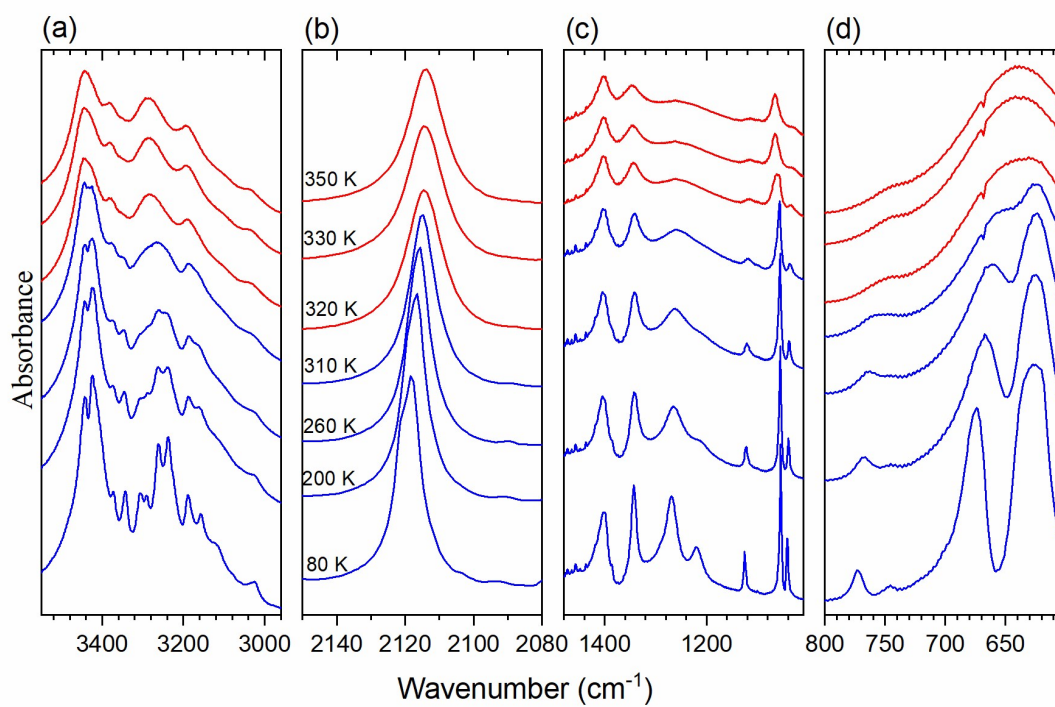

**Figure S10.** The details of the temperature-dependent IR spectra of  $\text{FA}_2\text{KFe}(\text{CN})_6$ .

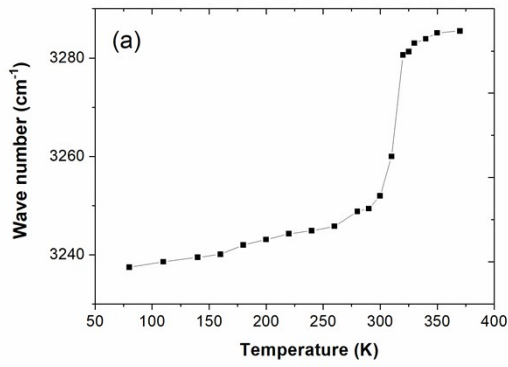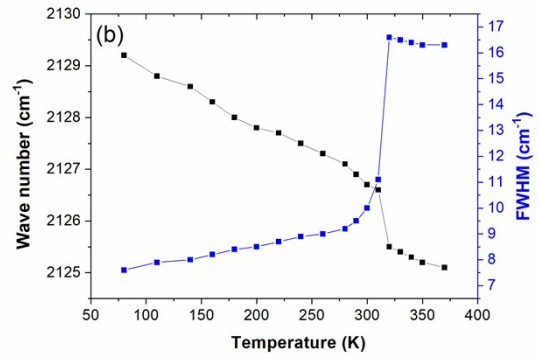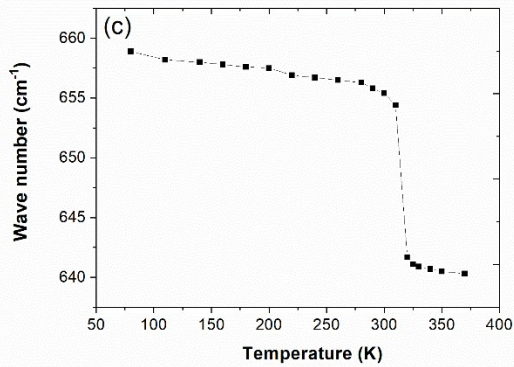

**Figure S11.** The plots of the wavenumber and FWHM vs. T of the selected IR modes: (a)  $\nu_{as}NH_2$ , (b)  $\nu CN^-$  and (c)  $\tau NH_2$  in  $FA_2KCo(CN)_6$ .

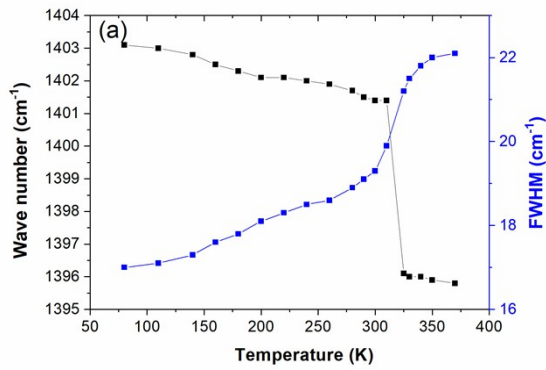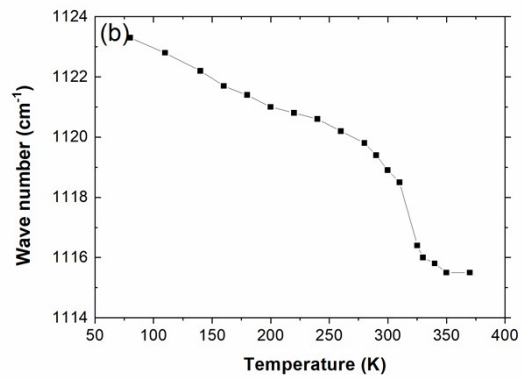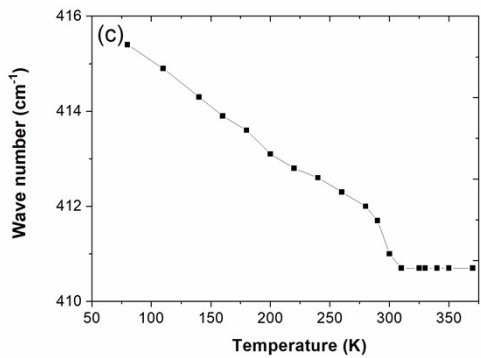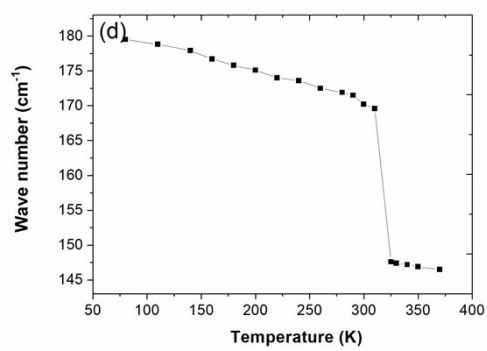

**Figure S12.** The plots of the wavenumber and FWHM vs. T of the selected Raman modes: (a)  $\delta CH$ , (b)  $\nu_s NCN$ , (c)  $T^- CN$  and (d) lattice modes in  $FA_2KCo(CN)_6$ .

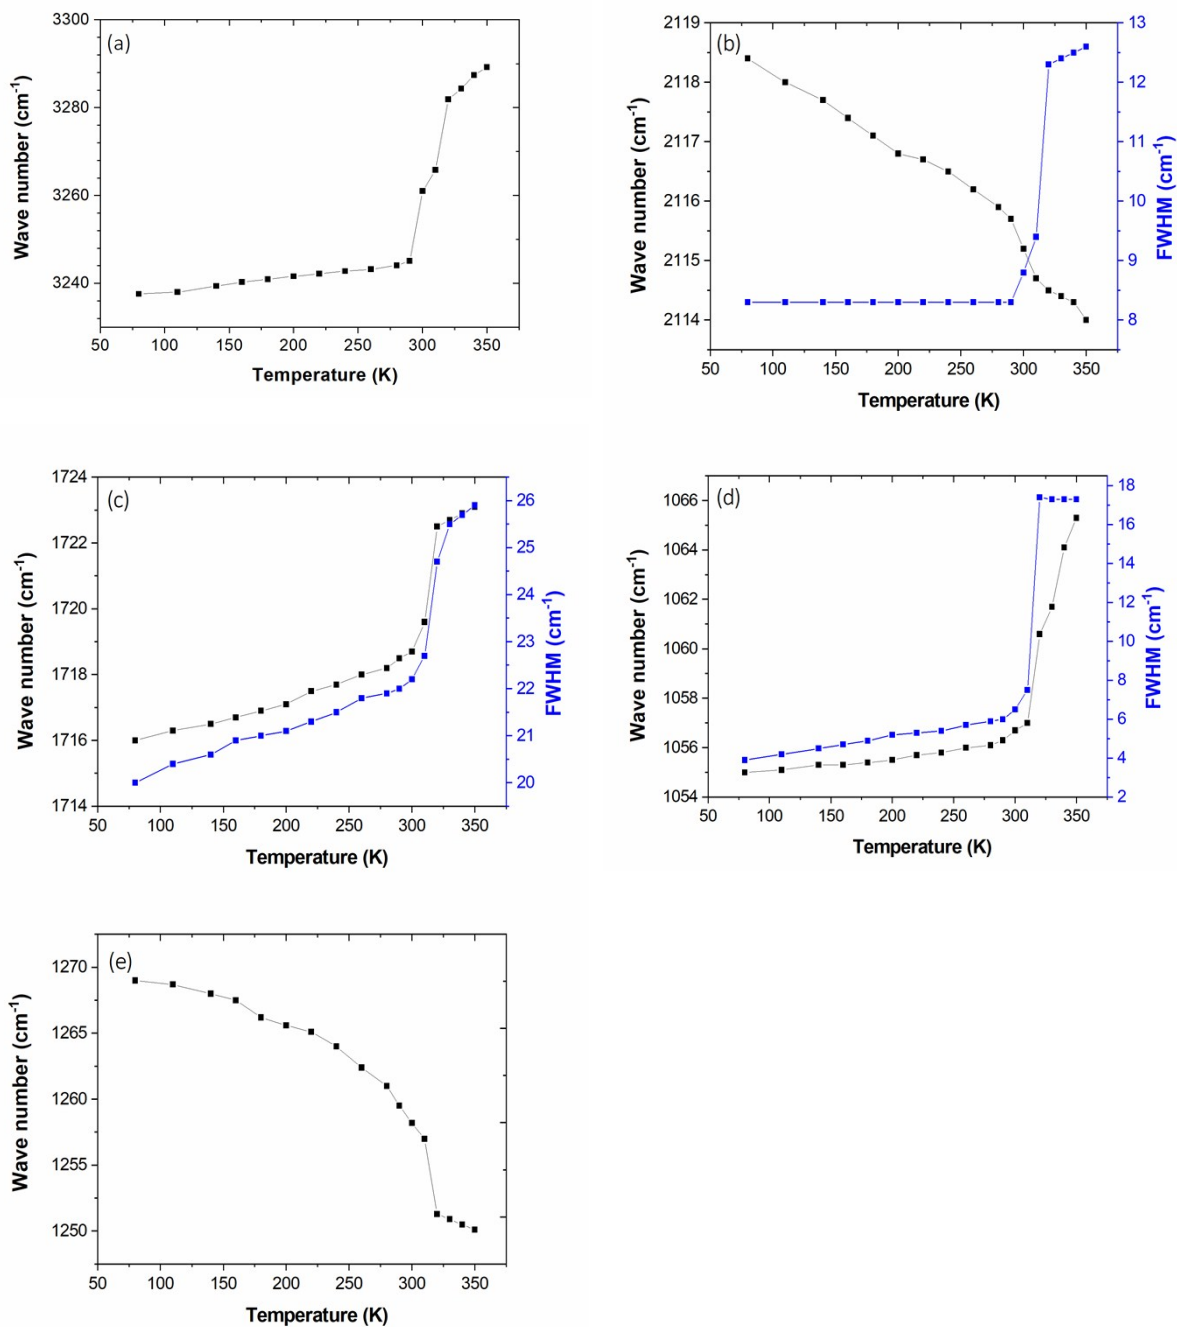

**Figure S13.** The plots of the wavenumber and FWHM vs. T of the selected IR modes: (a)  $\nu_{\text{as}}\text{NH}_2$ , (b)  $\nu\text{CN}^-$ , (c)  $\delta\text{NH}_2$ , (d)  $\omega\text{NH}_2$  and (e)  $\rho\text{NH}_2$  in  $\text{FA}_2\text{KFe}(\text{CN})_6$ .
